# Supplementary material
Source: PubMed Central journal article supplement (PMC3811891)
Supplement: MCB.00580-13_zmb999100178so1.pdf [file MCB.00580-13_zmb999100178so1.pdf]

## Supplemental Figure 1

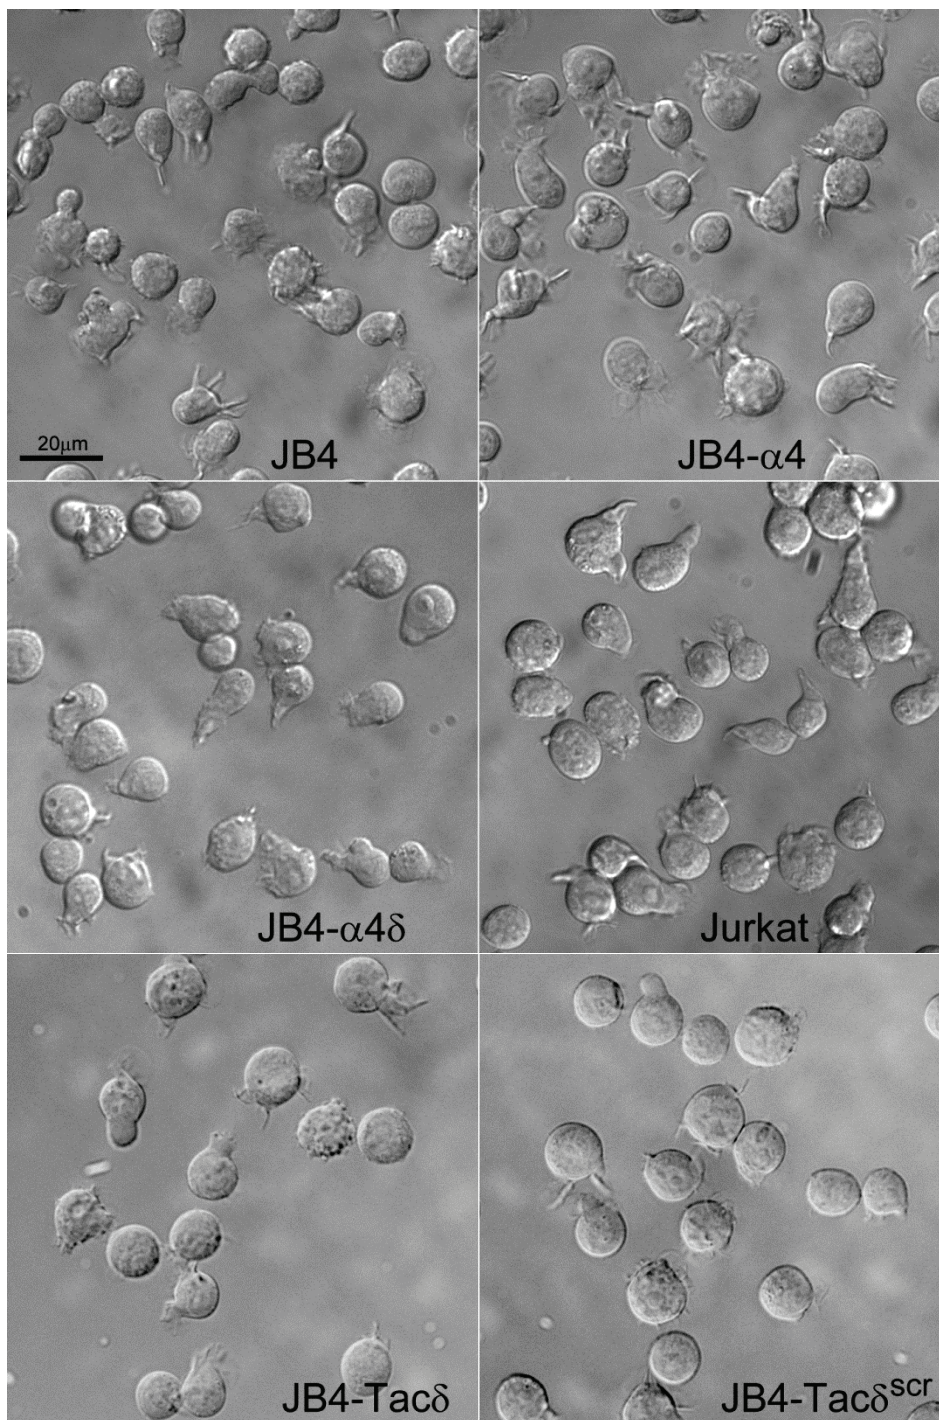

**FIG S1.** Representative differential interference contrast (DIC) images for the cell lines used in this study. The suspension cultured cells were imaged live under non-adherent conditions. Bar: 20 μm.

## Supplemental Figure 2

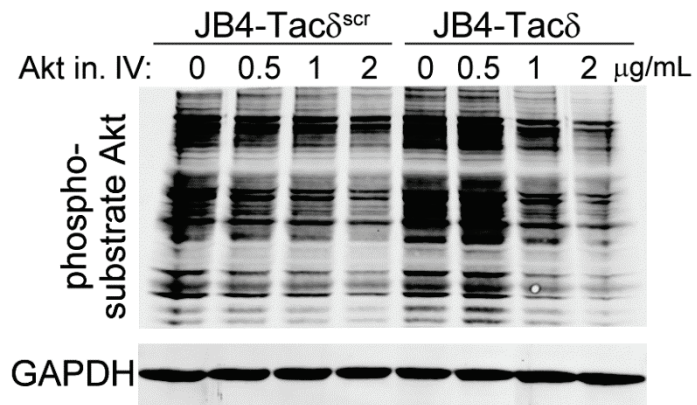

**FIG S2.** JB4-Tac $\Delta$  and JB4-Tac $\Delta$ <sup>scr</sup> cells were treated with Akt inhibitor IV at the indicated concentrations for 24 hours, and the lysates were blotted to detect Akt phosphorylated substrates and GAPDH.
